# Supplementary material for: Effectiveness of Cognitive Rehabilitation in Parkinson’s Disease: A Systematic Review and Meta-Analysis
Source: MDPI journal article supplement (doi:10.3390/jpm11050429), 2021-05-18
Supplement: s1 [file s1]

Table S3: Outcomes and assessment included in the meta-analysis

|                                                                                                        |
|--------------------------------------------------------------------------------------------------------|
| <b>Global cognitive status</b>                                                                         |
| Montreal Cognitive Assessment (MoCA)                                                                   |
| Mini Mental State Examination (MMSE)                                                                   |
| Demtec                                                                                                 |
| Addenbrooke's Cognitive Examination (ACE)                                                              |
| <b>Attention</b>                                                                                       |
| Digit span forward                                                                                     |
| Brief test of attention (BTA)                                                                          |
| Paced Auditory Serial Addition Test (PASAT)                                                            |
| <b>Working memory</b>                                                                                  |
| Face-Name-learning-Test (GNL)                                                                          |
| Digit span backward                                                                                    |
| Demtec- Digit span reverse                                                                             |
| <b>Verbal memory</b>                                                                                   |
| California Verbal Learning Test (CVLT)- Short and long delay free recall                               |
| Hopkins Verbal Learning Test- Revised (HVLT-R)- Short and long delay free recall                       |
| Selective Reminding Test (SRT)                                                                         |
| Demtec- Verbal short and long-term memory                                                              |
| Memo Test- Verbal short and long-term memory                                                           |
| Verbal episodic memory- A sentence recall task, a word list recall task                                |
| Consortium to Establish a Registry of Alzheimer's Disease Plus (CERAD +)- Wordlist Learning and recall |
| Logical Memory subtest of the Wechsler Memory Scale- III                                               |
| <b>Visual memory</b>                                                                                   |
| Modified Taylor figure- delayed recall                                                                 |
| Rey-Osterrieth Complex Figure Test (ROCFT)- Immediate and delayed recall                               |
| Brief Visuospatial Memory Test-Revised (BVM-T-R)- Short and long delay free recall                     |
| <b>Verbal fluency</b>                                                                                  |
| The F-A-S Phonemic Verbal Fluency Test                                                                 |

---

Semantic- Animals

---

Demtec- Animals

---

Controlled Oral Word Association Test (COWAT)

---

Phonemic and Semantic Verbal Test

---

**Executive functions**

---

Behavioural Assessment of the Dysexecutive Syndrome (BADS)

---

Tower of London (ToL)

---

Stroop Color Word Interference - Words-Colors

---

Stroop Color Word Interference - Interference

---

Zoo Map

---

Trail Making Test- Part B (TMT-B)

---

**Visuospatial and visuoconstructive abilities**

---

Key-Osterrieth Complex Figure Test (ROCFT)- copy

---

The Line Orientation subtest from the Repeatable Battery for the Assessment of Neuropsychological Status (RBANS)

---

Judgement of Line Orientation (JLO)

---

**Processing speed**

---

Symbol Digit Modalities Test (SDMT)

---

Trail Making Test- Part A (TMT-A)

---

The Salthouse Perceptual Comparison Test (SPCT)

---

Useful Field Of Vision (UFOV)

---

Stroop Color Word Interference- Word

---

Stroop Color Word Interference - Colors

---

**Depressive symptoms**

---

Geriatric Depression Scale (GDS-15)

---

Beck Depression Inventory II (BDI-II)

---

**Quality of life**

---

Parkinson's Disease Questionnaire (PDQ- 39)

---
