# Supplementary material for: Effectiveness of Cognitive Rehabilitation in Parkinson’s Disease: A Systematic Review and Meta-Analysis
Source: MDPI journal article supplement (doi:10.3390/jpm11050429), 2021-05-18

Figure S2: Forest plot of sensitive analysis: Effect sizes of randomized controlled trials

### Verbal memory

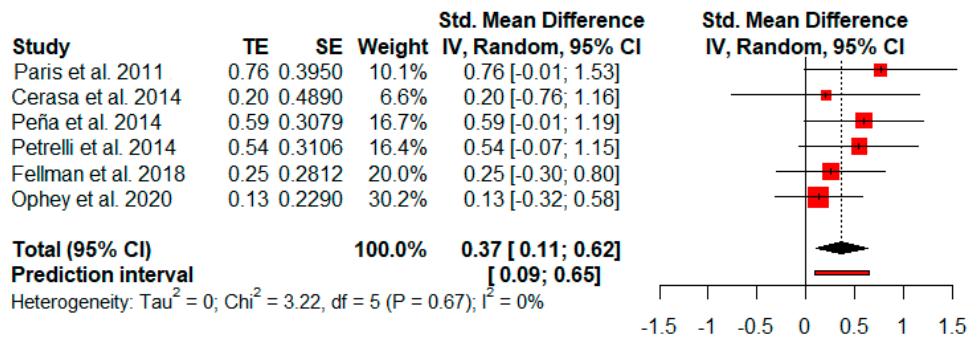

### Verbal fluency

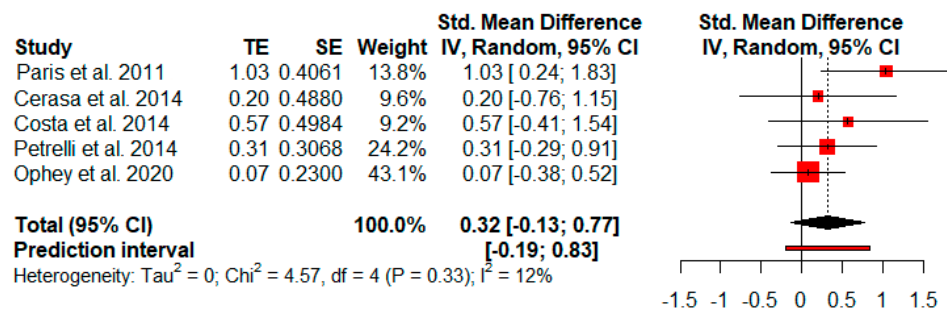

### Executive functions

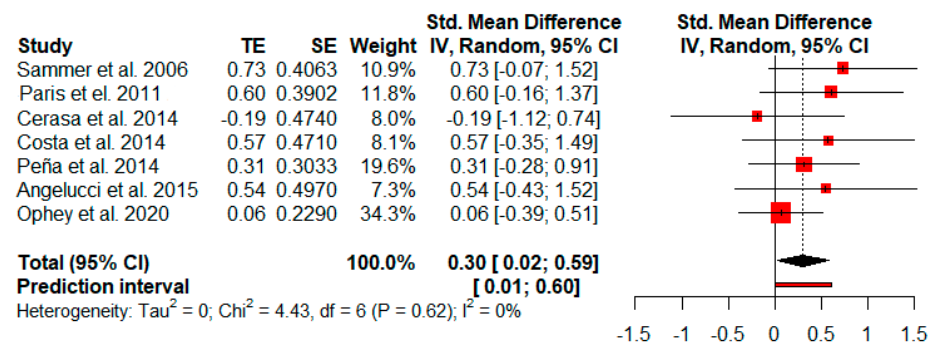

### Processing speed

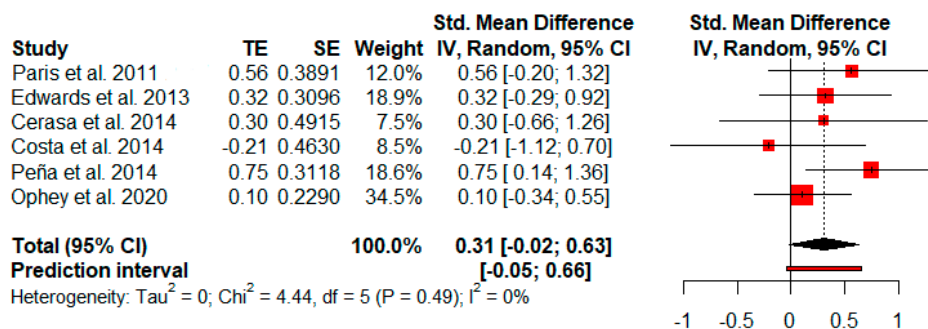

Supplement: s1 [file s1]
