# Supplementary material for: Effectiveness of Cognitive Rehabilitation in Parkinson’s Disease: A Systematic Review and Meta-Analysis
Source: MDPI journal article supplement (doi:10.3390/jpm11050429), 2021-05-18
Supplement: s1 [file s1]

## Supplementary material

Table S2: Methodological quality and risk of bias

| ROB-2. Randomized studies |             |                                             |                                                   |                                      |                                    |                                          |                      |
|---------------------------|-------------|---------------------------------------------|---------------------------------------------------|--------------------------------------|------------------------------------|------------------------------------------|----------------------|
| Study                     | PEDro Score | Bias arising from the randomization process | Bias due to deviation from intended interventions | Bias due to the missing outcome data | Bias in measurement of the outcome | Bias in selection of the reported result | Overall Risk of Bias |
| Sammer et al., 2006       | 6           | Unclear                                     | Unclear                                           | Low                                  | High                               | Low                                      | High                 |
| París et al., 2011        | 7           | Unclear                                     | Low                                               | Unclear                              | Low                                | Low                                      | Unclear              |
| Edwards et al., 2013      | 8           | Low                                         | Low                                               | Low                                  | High                               | Low                                      | High                 |
| Cerasa et al., 2014       | 8           | Unclear                                     | Low                                               | Low                                  | Low                                | Low                                      | Unclear              |
| Costa et al., 2014        | 8           | Unclear                                     | Low                                               | Low                                  | Low                                | Low                                      | Unclear              |
| Peña et al., 2014         | 8           | Low                                         | Low                                               | Low                                  | Low                                | Low                                      | Low                  |
| Petrelli et al., 2014     | 8           | Low                                         | Low                                               | Unclear                              | Low                                | Low                                      | Unclear              |
| Angelucci et al., 2015    | 7           | Unclear                                     | Low                                               | Low                                  | Low                                | Low                                      | Unclear              |
| Fellman et al., 2018      | 8           | Low                                         | Low                                               | Low                                  | Unclear                            | Low                                      | Unclear              |
| Bernini et al., 2020      | 8           | Low                                         | Low                                               | Low                                  | Low                                | Low                                      | Low                  |
| Ophey et al., 2020        | 9           | Low                                         | Low                                               | Low                                  | Low                                | Low                                      | Low                  |

Table S2: Risk of bias (continued)

| ROBINS-I. Non-randomized studies |                         |                                                  |                                         |                                                    |                          |                                 |                                          |                      |
|----------------------------------|-------------------------|--------------------------------------------------|-----------------------------------------|----------------------------------------------------|--------------------------|---------------------------------|------------------------------------------|----------------------|
| Study                            | Bias due to confounding | Bias in selection of participants into the study | Bias in classification of interventions | Bias due to deviations from intended interventions | Bias due to missing data | Bias in measurement of outcomes | Bias in selection of the reported result | Overall Risk of Bias |
| Naismith et al., 2013            | Low                     | Low                                              | Low                                     | Low                                                | Low                      | Low                             | Low                                      | Low                  |
