# Supplementary material for: Effectiveness of Cognitive Rehabilitation in Parkinson’s Disease: A Systematic Review and Meta-Analysis
Source: MDPI journal article supplement (doi:10.3390/jpm11050429), 2021-05-18
Supplement: s1 [file s1]

## Supplementary material

Table S1: Search strategy

| CONCEPT 1                                      |  | CONCEPT 2 |                                                                                                            | -                                                              | Number of obtained results (n= 1472) |
|------------------------------------------------|--|-----------|------------------------------------------------------------------------------------------------------------|----------------------------------------------------------------|--------------------------------------|
| ("Parkinson's disease" OR "Parkinson disease") |  | AND       | ("Cognitive rehabilitation" OR "Cognitive remediation" OR "Cognitive training" OR "Cognitive stimulation") |                                                                | 144                                  |
| CONCEPT 1                                      |  | CONCEPT 2 |                                                                                                            | CONCEPT 3                                                      | -                                    |
| ("Parkinson's disease" OR "Parkinson disease") |  | AND       | (Attention*)                                                                                               | AND (Rehabilitation OR Remediation OR Training OR Stimulation) | 527                                  |
| ("Parkinson's disease" OR "Parkinson disease") |  | AND       | ("Working memory")                                                                                         | AND (Rehabilitation OR Remediation OR Training OR Stimulation) | 106                                  |
| ("Parkinson's disease" OR "Parkinson disease") |  | AND       | (Memory)                                                                                                   | AND (Rehabilitation OR Remediation OR Training OR Stimulation) | 451                                  |
| ("Parkinson's disease" OR "Parkinson disease") |  | AND       | ("Executive function*")                                                                                    | AND (Rehabilitation OR Remediation OR Training OR Stimulation) | 244                                  |

Note: The search strategy was filtered by title and abstract.
