# Supplementary material for: Effectiveness of Cognitive Rehabilitation in Parkinson’s Disease: A Systematic Review and Meta-Analysis
Source: J Pers Med. 2021 May 18;11(5):429. doi: 10.3390/jpm11050429 (PMC8157874; doi:10.3390/jpm11050429)
Supplement: Supplementary file 1 [file jpm-11-00429-s001.zip]

Archive with 5 entries (5 files):
- SupplementaryMaterialFigure2_IbarretxeBilbao.pdf
- SupplementaryMaterial_Figure1_IbarretxeBilbao.pdf
- SupplementaryMaterial_Table1_SearchStrategy.pdf
- SupplementaryMaterial_Table2_IbarretxeBilbao.pdf
- SupplementaryMaterial_Table3_IbarretxeBilbao.pdf
